# Supplementary material for: Electrostatically tunable interaction of CO2 with MgO surfaces and chemical switching: first-principles theory
Source: Royal Society of Chemistry journal article supplement (doi:10.1039/d3cp04588a), 2024-01-01
Supplement: d3cp04588a1.pdf [file d3cp04588a1.pdf]

## Supplementary Information

Arpita Sen,<sup>a</sup> Ayush K. Narsaria\*,<sup>b</sup> Meghna A. Manae,<sup>a</sup> Sharan Shetty,<sup>b</sup> and Umesh V. Waghmare\*<sup>a</sup>

<sup>a</sup> Theoretical Sciences Unit, Jawaharlal Nehru Centre for Advanced Scientific Research, Jakkur, Bangalore 560064, India

<sup>b</sup> Shell India Markets Pvt. Ltd, Mahadeva Kodigehalli, Bengaluru, Karnataka 562149, India

## Computational Details

To validate our choice of freezing the bottom two layers in the adsorption calculations, we first checked the forces on the frozen layers of all the relaxed structures and found the maximum and minimum values of forces are  $0.1 \text{ eV/\AA}$  for MgO (110) O-site and  $0.005 \text{ eV/\AA}$  for MgO(111)-O terminated O-site, respectively. We further relaxed the MgO slab, with and without the  $\text{CO}_2$  molecule, along with relaxing all the atomic layers. The adsorption energies,  $E_{\text{ad}}$ , changes by merely  $0.003 \text{ eV}$  in the case without the  $\text{CO}_2$  adsorbate and  $0.007 \text{ eV}$  in the case with the  $\text{CO}_2$  adsorbate (maximum forces on unrelaxed atoms). Since the difference in adsorption energy is in order of meV, the choice of freezing the bottom two layers is justified.

### MgO (100) surface: Adsorption of $\text{CO}_2$ on bridge site

We found here significant structural transformation at  $0.203 \text{ V/\AA}$  electric field with initial structure at 0 electric field. It is different from the relaxed structure even at  $0.202 \text{ V/\AA}$ . Applying electric field of  $0.203 \text{ V/\AA}$  on the relaxed structure at 0 or  $0.202 \text{ V/\AA}$  leads to the structural change in  $\text{CO}_2$  molecule (O-C-O bond angle changes from  $133^\circ$  to  $169^\circ$ ). But the switch back to the structure of 0 electric field from a relaxed structure at  $0.203 \text{ V/\AA}$  is not observed. The two metastable states are found here and the interaction of dipole moment with the AEEF is primarily responsible for the transformation.

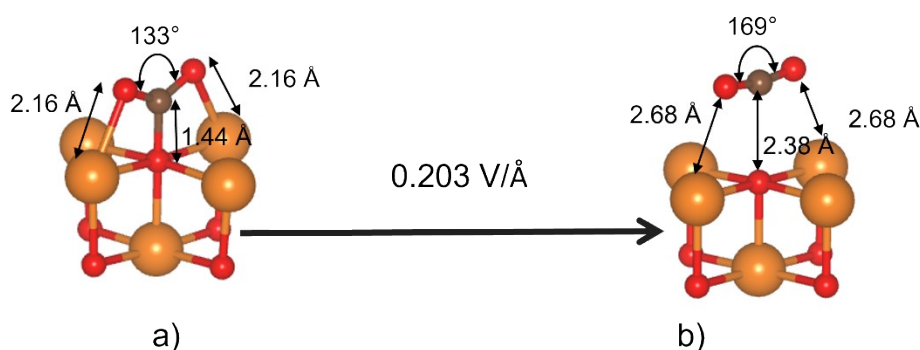

Fig. S1. Change in structure of the MgO (100)- $\text{CO}_2$  adsorbed system on bridge site upon application of AEEF.

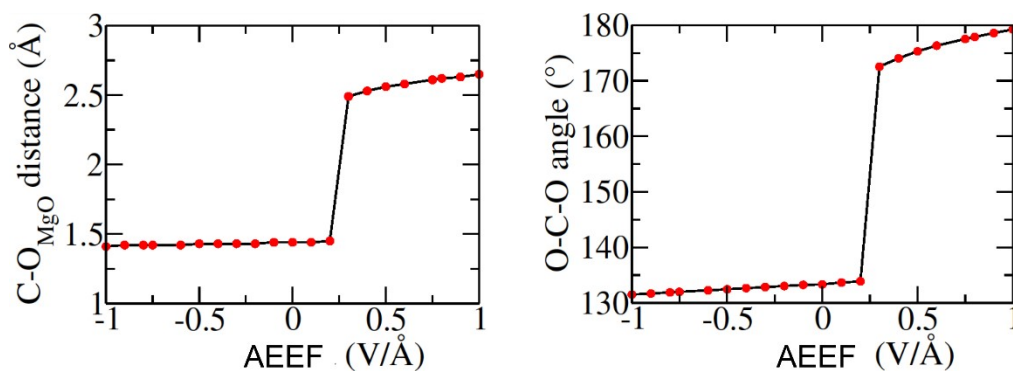

Fig. S2. Correlation plots of C-O(MgO) bond distance (on left) and O-C-O (CO<sub>2</sub>) bond angle (on right) *versus* AEEF in case of MgO (100)-CO<sub>2</sub> adsorbed system on bridge site.

### MgO (100) surface: Adsorption of CO<sub>2</sub> on Mg site

3 types of structures are found here. The relaxed structure at 0 electric field is mentioned as A<sub>h</sub> with linear CO<sub>2</sub> molecule on hollow site. When electric field of -0.5 V/Å is applied CO<sub>3</sub><sup>2-</sup> species is formed, which is classified as C. Considering type C structure as initial structure, relaxing with 0 electric field, switch to the A<sub>h</sub> structure is not observed. Rather, C type structure is formed, but the E<sub>ad</sub> is higher than C type structure. When B<sub>Mg</sub> is relaxed with 0 electric field E<sub>ad</sub> becomes slightly more stable but the structure remains same as B<sub>mg</sub>.

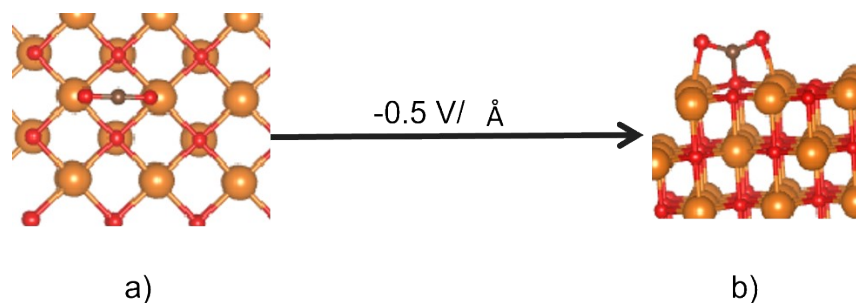

Fig. S3. Change in structure of the MgO (100)-CO<sub>2</sub> adsorbed system on Mg site upon application of AEEF.

### MgO (100) surface: Adsorption of CO<sub>2</sub> on O site

Qualitatively we found here two class of structures which are mentioned as Region I and Region II with  $E_{ad}$  value of  $\sim -0.6$  eV. With onset of electric field  $0.2$  V/Å on the ground state optimized structure at  $0.0$  V/Å, a structural transformation is found where CO<sub>2</sub> is desorbed from the adsorbed state at 0 electric field. When this desorbed structure is relaxed at 0 electric field no transformation is observed but  $E_{ad}$  becomes more stable by  $0.18$  eV, almost same as 0 electric field relaxed structure. With the relaxed structure at  $-0.8$  V/Å, which is found lowest in energy among all, when relaxed with 0 electric field,  $E_{ad}$  increases slightly, and the structure is relatively unchanged compared to the reactant structure.

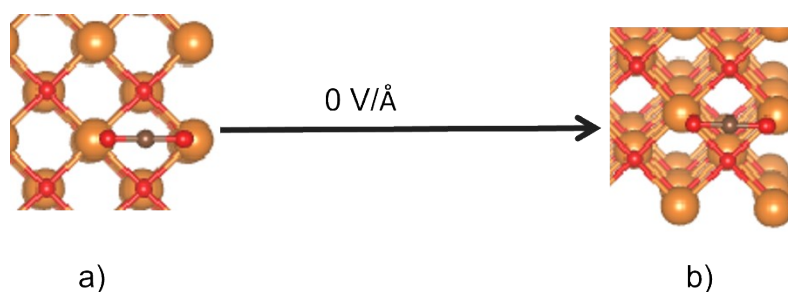

Fig. S4. Change in structure of the MgO (100)-CO<sub>2</sub> adsorbed system on O site upon application of AEEF.

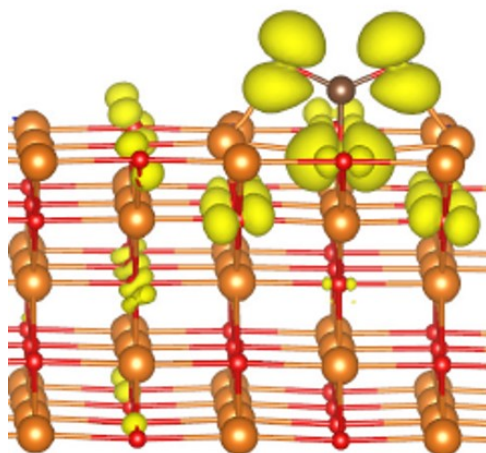

Fig. S5. Isosurface of the charge density associated with an occupied state at Y-point in the configuration of CO<sub>2</sub> interacting with MgO (110) surface, adsorbing on O-site, at AEEF of  $0.1$  V/Å.

### MgO (110) surface: Adsorption of CO<sub>2</sub> on Mg site

3 metastable states are found here with structural transformation at electric field  $-0.1 \text{ V/\AA}$ ,  $-0.5 \text{ V/\AA}$  and at  $-0.8 \text{ V/\AA}$ . We found CO<sub>2</sub> adsorption at 0 electric field relaxed structure and when electric field  $-0.1 \text{ V/\AA}$  is applied CO<sub>2</sub> is desorbed. With this desorbed structure, when 0 electric field is applied and relaxed CO<sub>2</sub> does not get adsorbed, but the  $E_{\text{ad}}$  becomes stable by 1.2 eV. On application of electric field  $-0.5 \text{ V/\AA}$ , the relaxed structure at 0 electric field remains the same. When this relaxed structure at  $-0.5 \text{ V/\AA}$  is relaxed with  $-0.1 \text{ V/\AA}$ ,  $E_{\text{ad}}$  increases by 0.12 eV, while the structure remains relatively same.

### MgO (110) surface: Adsorption of CO<sub>2</sub> on bridge site

We found here two metastable states with structural transformation at  $0.3 \text{ V/\AA}$ . The relaxed structure at 0 electric field is an adsorbed state where a carbonate-like species is formed. Considering the relaxed structure at 0 electric field as the initial one, when relaxed with  $0.3 \text{ V/\AA}$ , the structure changes and the  $E_{\text{ad}}$  becomes more stable by 0.78 eV. On the other hand, when the relaxed structure at  $0.3 \text{ V/\AA}$  is relaxed at  $0.2 \text{ V/\AA}$  electric field, energy becomes unstable by 0.079 eV but the structure remains relatively unchanged.  $E_{\text{ad}}$  becomes unstable by 0.093 eV when the relaxed structure at  $0.3 \text{ V/\AA}$  is further relaxed with 0 electric field.

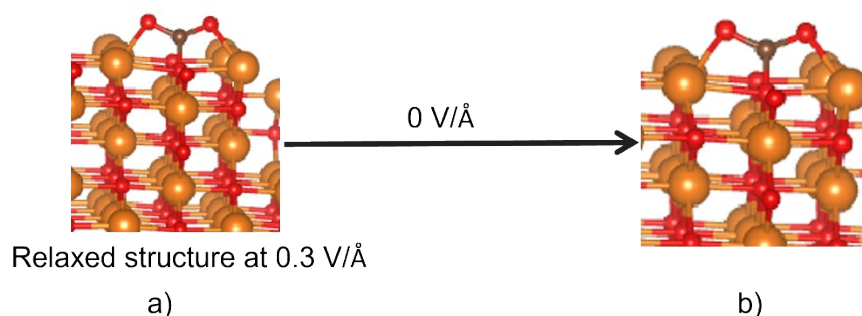

Fig. S6. Change in structure of the MgO (110)-CO<sub>2</sub> adsorbed system on bridge site upon application of AEEF

### MgO (111-Mg terminated) surface: Adsorption of CO<sub>2</sub> on Mg site

2 metastable states are found with structural transformation on application of electric field  $-0.7$  V/Å. The linear CO<sub>2</sub> molecule is weakly adsorbed at 0 electric field. The structure remains almost unaltered in the electric field range from  $-0.6$  V/Å to  $1$  V/Å. On application of electric field  $-0.7$  V/Å to the relaxed structure at 0 electric field, carbonate-like species is formed by the interaction of CO<sub>2</sub> with two O atoms and one Mg atom on the surface. This process is irreversible, i.e, the carbonate-like structure upon application of 0 electric field does not relax to the 0 electric field structure.

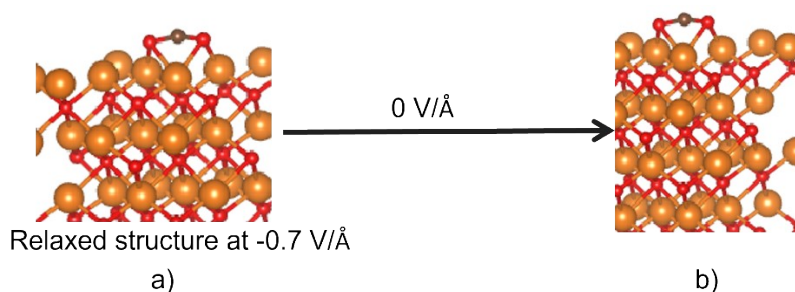

Fig. S7. Change in structure of the MgO (111)-CO<sub>2</sub> Mg-terminated adsorbed system on Mg site upon application of AEEF

### MgO (111-Mg terminated) surface: Adsorption of CO<sub>2</sub> on bridge site

3 types of states are found here with significant structural transformations. Upon application of  $0.5$  V/Å electric field, dissociative adsorption was observed where CO fragment is bonded perpendicularly with the MgO slab. This dissociative adsorption is not reversible. The dissociated CO<sub>2</sub>-like structure is irreversible as the structure remains unaltered upon application of 0 electric field.
